# Supplementary material for: Antispasmodic Effect of Valeriana pilosa Root Essential Oil and Potential Mechanisms of Action: Ex Vivo and In Silico Studies
Source: MDPI journal article supplement (doi:10.3390/pharmaceutics15082072), 2023-08-02
Supplement: s1 [file s1]

# Antispasmodic Effect of *Valeriana pilosa* Root Essential Oil and Potential Mechanisms of Action: Ex Vivo and In Silico Studies

Roberto O. Ybañez-Julca <sup>1,\*</sup>, Ricardo Pino-Ríos <sup>2,3</sup>, Iván M. Quispe-Díaz <sup>1</sup>, Daniel Asunción-Alvarez <sup>1</sup>, Edwin E. Acuña-Tarrillo <sup>1</sup>, Elena Mantilla-Rodríguez <sup>1</sup>, Patricia Minchan-Herrera <sup>1</sup>, Marcelo A. Catalán <sup>4</sup>, Liz Zevallos-Escobar <sup>5</sup>, Edison Vásquez-Corales <sup>5</sup>, Osvaldo Yáñez <sup>6</sup>, Wilfredo Gutiérrez-Alvarado <sup>7</sup> and Julio Benites <sup>2,3,\*</sup>

<sup>1</sup> Facultad de Farmacia y Bioquímica, Universidad Nacional de Trujillo, Trujillo 13011, Perú; rybanez@unitru.edu.pe (R.O.Y.-J.); iquispe@unitru.edu.pe (I.M.Q.-D.); hasuncion@unitru.edu.pe (D.A.-A.); eacunat@unitru.edu.pe (E.E.A.-T.); jgonzalesn@unitru.edu.pe (D.G.-N.); amnatilla@unitru.edu.pe (E.M.-R.); pminchan@unitru.edu.pe (P.M.-H.)

<sup>2</sup> Química y Farmacia, Facultad de Ciencias de la Salud, Universidad Arturo Prat, Casilla 121, Iquique 1100000, Chile; juliob@unap.cl (J.B.)

<sup>3</sup> Instituto de Estudios de la Salud, Universidad Arturo Prat, Casilla 121, Iquique 1100000, Chile; rpinoiros@unap.cl (R.P.-R.)

<sup>4</sup> Instituto de Fisiología, Facultad de Medicina, Universidad Austral de Chile, Valdivia 5090000, Chile; marcelo.catalan@uach.cl (M.A.C.)

<sup>5</sup> Escuela de Farmacia y Bioquímica, Universidad Católica Los Ángeles de Chimbote, Chimbote 02801, Perú; lzevallose@uladech.edu.pe (L.Z.-E.); evasquezc@uladech.edu.pe (E.V.-C.)

<sup>6</sup> Facultad de Ingeniería y Negocios, Universidad de las Américas, Santiago 7500000, Chile; oyanez@udla.cl (O.Y.)

<sup>7</sup> Facultad de Farmacia y Bioquímica, Universidad Nacional de la Amazonía Peruana, Iquitos 16001, Perú; Wilfredo.gutierrez@unapiquitos@edu.pe (W.G.-A)

\* Correspondence: rybanez@unitru.edu.pe (R.O.Y.-J.); juliob@unap.cl (J.B.); Tel.: +51-0449-7634-5993 (R.O.Y.-J.); Tel.: +56-57-2252-6275 (J.B.)

## SUPPORTING INFORMATION

**Table S1.** Smiles for all compounds in *Valeriana pilosa* essential oil.

| N° | Compounds              | Smiles                                                                    |
|----|------------------------|---------------------------------------------------------------------------|
| 1  | Isovaleric acid        | <chem>CC(CC(=O)O)C</chem>                                                 |
| 2  | Tricyclene             | <chem>C[C@]12[C@@H]3[C@H]1C[C@H](C2(C)C)C3</chem>                         |
| 3  | $\alpha$ -Thujene      | <chem>CC1=CC[C@@]2([C@H]1C2)C(C)C</chem>                                  |
| 4  | $\alpha$ -Pinene       | <chem>CC1=CC[C@H]2C[C@@H]1C2(C)C</chem>                                   |
| 5  | Camphene               | <chem>C=C1[C@H]2CC[C@@H](C1(C)C)C2</chem>                                 |
| 6  | 3-Methyl valeric acid  | <chem>C[C@H](CC)CC(=O)O</chem>                                            |
| 7  | Sabinene               | <chem>C=C1CC[C@@]2([C@H]1C2)C(C)C</chem>                                  |
| 8  | 1-Octen-3-ol           | <chem>CCCCC[C@H](C=C)O</chem>                                             |
| 9  | $\beta$ -Pinene        | <chem>C=C1CC[C@H]2C[C@@H]1C2(C)C</chem>                                   |
| 10 | Myrcene                | <chem>C=CC(=C)CCC=C(C)C</chem>                                            |
| 11 | Limonene               | <chem>CC1=CC[C@@H](CC1)C(=C)C</chem>                                      |
| 12 | p-Cymene               | <chem>Cc1ccc(cc1)C(C)C</chem>                                             |
| 13 | 1,8-Cineole            | <chem>C[C@]12CC[C@H](CC1)C(O2)(C)C</chem>                                 |
| 14 | Linalool               | <chem>C=C[C@](CCC=C(C)C)(O)C</chem>                                       |
| 15 | Isopentyl isovalerate  | <chem>CC(CCOC(=O)CC(C)C)C</chem>                                          |
| 16 | Camphor                | <chem>O=C1C[C@H]2C([C@]1(C)CC2)(C)C</chem>                                |
| 17 | Menthone               | <chem>C[C@@H]1CC[C@@H](C(=O)C1)C(C)C</chem>                               |
| 18 | Isomenthone            | <chem>C[C@@H]1CC[C@@H](C(=O)C1)C(C)C</chem>                               |
| 19 | Borneol                | <chem>O[C@@H]1C[C@H]2C([C@]1(C)CC2)(C)C</chem>                            |
| 20 | Neomenthol             | <chem>C[C@H]1CC[C@H]([C@@H](C1)O)C(C)C</chem>                             |
| 21 | Menthol                | <chem>C[C@@H]1CC[C@H]([C@H](C1)O)C(C)C</chem>                             |
| 22 | Carvone                | <chem>CC(=C)[C@@H]1CC=C(C(=O)C1)C</chem>                                  |
| 23 | Menthyl acetate        | <chem>C[C@@H]1CC[C@H]([C@@H](C1)OC(=O)C)C(C)C</chem>                      |
| 24 | $\alpha$ -Cubebene     | <chem>CC([C@H]1CC[C@H]([C@@]23[C@@H]1[C@@H]2C(=CC3)C)C)C</chem>           |
| 25 | Cyclosativene          | <chem>CC([C@H]1CC[C@@H]([C@@]23[C@@H]1[C@@H]2[C@@H]([C@]21C)C3)C)C</chem> |
| 26 | $\alpha$ -Copaene      | <chem>C[C@@H]1CC[C@@]2([C@@H]3[C@H]1[C@H]2C(=CC3)C)C</chem>               |
| 27 | $\beta$ -Patchoulene   | <chem>C[C@@H]1CCCC2=C1C[C@H]1CC[C@@]2(C1(C)C)C</chem>                     |
| 28 | $\beta$ -Bourbonene    | <chem>CC([C@@H]1CC[C@@]2([C@H]1[C@@H]1C(=C)CC[C@H]21)C)C</chem>           |
| 29 | $\beta$ -Elemene       | <chem>C=C[C@@]1(C)CC[C@H](C[C@H]1C(=C)C)C(=C)C</chem>                     |
| 30 | $\beta$ -Caryophyllene | <chem>C[C@H]1CCCC(=C)[C@H]2[C@H](CC1)C(C2)(C)C</chem>                     |
| 31 | Seychellene            | <chem>C[C@H]1CC[C@@]2([C@@]3([C@H]1C[C@H](C2=C)CC3)C)C</chem>             |
| 32 | $\alpha$ -Guaiene      | <chem>CC(=C)[C@@H]1CC[C@@H](C2=C(C1)[C@@H](C)CC2)C</chem>                 |
| 33 | $\alpha$ -Humulene     | <chem>CC1=CCC(C)(C)C=CCC(=CCC1)C</chem>                                   |
| 34 | allo-Aromadendrene     | <chem>C[C@H]1CC[C@@H]2[C@H]1[C@@H]1[C@@H](C1(C)C)CCC2=C</chem>            |
| 35 | $\alpha$ -Patchoulene  | <chem>C[C@H]1CC[C@]23[C@@H]1C[C@@H](C3(C)C)CC=C2C</chem>                  |

|    |                              |                                                                  |
|----|------------------------------|------------------------------------------------------------------|
| 36 | $\gamma$ -Muurolene          | <chem>CC1=C[C@H]2[C@@H](CC1)C(=C)CC[C@@H]2C(C)C</chem>           |
| 37 | Germacrene-D                 | <chem>CC1=CCCC(=C)C=C[C@@H](CC1)C(C)C</chem>                     |
| 38 | Valencene                    | <chem>CC(=C)[C@@H]1CCC2=CCC[C@H]([C@]2(C1)C)C</chem>             |
| 39 | Eremophyllene                | <chem>CC(=C)[C@@H]1CC[C@@H]2[C@](C1)(C)C(=CCC2)C</chem>          |
| 40 | $\gamma$ -Cadinene           | <chem>CC1=C[C@@H]2[C@H](CC1)C(=C)CC[C@@H]2C(C)C</chem>           |
| 41 | 7-epi- $\alpha$ -Selinene    | <chem>CC1=CCC[C@]2([C@@H]1C[C@@H](CC2)C(=C)C)C</chem>            |
| 42 | $\delta$ -Cadinene           | <chem>CC1=C[C@H]2C(=C(C)CC[C@H]2C(C)C)CC1</chem>                 |
| 43 | Spathulenol                  | <chem>C=C1CC[C@H]2[C@@H]([C@@H]3[C@@H]1CC[C@]3(C)O)C2(C)C</chem> |
| 44 | $\beta$ -Caryophyllene oxide | <chem>C=C1CC[C@@H]2O[C@@]2(CC[C@@H]2[C@@H]1CC2(C)C)C</chem>      |
| 45 | T-Cadinol                    | <chem>CC1=C[C@H]2[C@@H](CC1)[C@@](C)(O)CC[C@H]2C(C)C</chem>      |
| 46 | $\delta$ -Cadinol            | <chem>CC1=C[C@H]2[C@@H](CC1)[C@@](C)(O)CC[C@H]2C(C)C</chem>      |
| 47 | Patchoulol                   | <chem>C[C@H]1CC[C@@]2([C@@]3([C@H]1C[C@H](C2(C)C)CC3)C)O</chem>  |

---

**Table S2.** Composition (in %) of *Valeriana pilosa* essential oil. Taken from reference 20.

| N° | Components             | Composition (in %) |
|----|------------------------|--------------------|
| 1  | Isovaleric acid        | 2.6                |
| 2  | Tricyclene             | 0                  |
| 3  | $\alpha$ -Thujene      | 0.1                |
| 4  | $\alpha$ -Pinene       | 3.7                |
| 5  | Camphene               | 1.4                |
| 6  | 3-Methyl valeric acid  | 3.1                |
| 7  | Sabinene               | 0.4                |
| 8  | 1-Octen-3-ol           | 0                  |
| 9  | $\beta$ -Pinene        | 0.6                |
| 10 | Myrcene                | 0.1                |
| 11 | Limonene               | 3.2                |
| 12 | p-Cymene               | 0                  |
| 13 | 1,8-Cineole            | 4.3                |
| 14 | Linalool               | 0.1                |
| 15 | Isopentyl isovalerate  | 0                  |
| 16 | Camphor                | 0.2                |
| 17 | Menthone               | 0.8                |
| 18 | Isomenthone            | 0.2                |
| 19 | Borneol                | 0                  |
| 20 | Neomenthol             | 0                  |
| 21 | Menthol                | 1.2                |
| 22 | Carvone                | 0.1                |
| 23 | Menthyl acetate        | 1.4                |
| 24 | $\alpha$ -Cubebene     | 0.2                |
| 25 | Cyclosativene          | 0.1                |
| 26 | $\alpha$ -Copaene      | 1                  |
| 27 | $\beta$ -Patchoulene   | 0.4                |
| 28 | $\beta$ -Bourbonene    | 0.4                |
| 29 | $\beta$ -Elemene       | 0.8                |
| 30 | $\beta$ -Caryophyllene | 3.5                |
| 31 | Seychellene            | 7.6                |
| 32 | $\alpha$ -Guaiene      | 4.1                |
| 33 | $\alpha$ -Humulene     | 6.1                |
| 34 | allo-Aromadendrene     | 2.2                |
| 35 | $\alpha$ -Patchoulene  | 5.8                |
| 36 | $\gamma$ -Muurolene    | 1                  |
| 37 | Germacrene-D           | 0.4                |

|    |                                 |      |
|----|---------------------------------|------|
| 38 | Valencene                       | 0.3  |
| 39 | Eremophyllene                   | 0.3  |
| 40 | $\gamma$ -Cadinene              | 0.2  |
| 41 | 7-epi- $\alpha$ -Selinene       | 2.5  |
| 42 | $\delta$ -Cadinene              | 0.8  |
| 43 | Spathulenol                     | 1.6  |
| 44 | $\beta$ -Caryophyllene<br>oxide | 2.9  |
| 45 | T-Cadinol                       | 0.5  |
| 46 | $\delta$ -Cadinol               | 0.5  |
| 47 | Patchoulol                      | 20.8 |

---

**Table S3.**  $\Delta E_{binding}$  (kcal·mol<sup>-1</sup>),  $K_d$ ,  $LE$  (kcal·mol<sup>-1</sup>),  $BEI$ (kDa),  $LLE$ ,  $IE_{norm.binding}$  (kcal·mol<sup>-1</sup>) obtained after molecular docking between *Valeriana pilosa* essential oil compounds and M<sub>3</sub> Muscarinic Acetylcholine Receptor (PDBID: 4DAJ).

| N° | Compounds              | $\Delta E_{binding}$<br>(kcal·mol <sup>-1</sup> ) | $K_d$    | $LE$<br>(kcal·mol <sup>-1</sup> ) | $BEI$ (kDa) | $LLE$ | $IE_{norm.binding}$<br>(kcal·mol <sup>-1</sup> ) |
|----|------------------------|---------------------------------------------------|----------|-----------------------------------|-------------|-------|--------------------------------------------------|
| 1  | Isovaleric acid        | -4.5                                              | 5.04E-04 | 0.6                               | 32.3        | 2.2   | -1.7                                             |
| 2  | Tricyclene             | -6.5                                              | 1.72E-05 | 0.7                               | 35.0        | 2.1   | -2.1                                             |
| 3  | $\alpha$ -Thujene      | -6.7                                              | 1.23E-05 | 0.7                               | 36.0        | 1.9   | -2.1                                             |
| 4  | $\alpha$ -Pinene       | -6.8                                              | 1.04E-05 | 0.7                               | 36.6        | 2.0   | -2.2                                             |
| 5  | Camphene               | -6.7                                              | 1.23E-05 | 0.7                               | 36.0        | 1.9   | -2.1                                             |
| 6  | 3-Methyl valeric acid  | -4.8                                              | 3.04E-04 | 0.6                               | 30.3        | 2.0   | -1.7                                             |
| 7  | Sabinene               | -6.8                                              | 1.04E-05 | 0.7                               | 36.6        | 2.0   | -2.2                                             |
| 8  | 1-Octen-3-ol           | -5.1                                              | 1.83E-04 | 0.6                               | 29.2        | 1.6   | -1.7                                             |
| 9  | $\beta$ -Pinene        | -6.8                                              | 1.04E-05 | 0.7                               | 36.6        | 2.0   | -2.2                                             |
| 10 | Myrcene                | -5.9                                              | 4.74E-05 | 0.6                               | 31.7        | 0.8   | -1.9                                             |
| 11 | Limonene               | -6.5                                              | 1.72E-05 | 0.7                               | 35.0        | 1.5   | -2.1                                             |
| 12 | p-Cymene               | -6.5                                              | 1.72E-05 | 0.7                               | 35.5        | 1.6   | -2.1                                             |
| 13 | 1,8-Cineole            | -6.7                                              | 1.23E-05 | 0.6                               | 31.8        | 2.2   | -2.0                                             |
| 14 | Linalool               | -5.9                                              | 4.74E-05 | 0.5                               | 28.0        | 1.7   | -1.8                                             |
| 15 | Isopentyl isovalerate  | -6.0                                              | 4.01E-05 | 0.5                               | 25.5        | 1.8   | -1.7                                             |
| 16 | Camphor                | -6.7                                              | 1.23E-05 | 0.6                               | 32.3        | 2.5   | -2.0                                             |
| 17 | Menthone               | -6.7                                              | 1.23E-05 | 0.6                               | 31.8        | 2.3   | -2.0                                             |
| 18 | Isomenthone            | -6.7                                              | 1.23E-05 | 0.6                               | 31.8        | 2.3   | -2.0                                             |
| 19 | Borneol                | -6.5                                              | 1.72E-05 | 0.6                               | 30.9        | 2.6   | -2.0                                             |
| 20 | Neomenthol             | -6.6                                              | 1.46E-05 | 0.6                               | 31.0        | 2.4   | -2.0                                             |
| 21 | Menthol                | -6.3                                              | 2.41E-05 | 0.6                               | 29.5        | 2.2   | -1.9                                             |
| 22 | Carvone                | -6.9                                              | 8.77E-06 | 0.6                               | 33.7        | 2.6   | -2.1                                             |
| 23 | Menthyl acetate        | -7.4                                              | 3.77E-06 | 0.5                               | 27.3        | 2.4   | -2.0                                             |
| 24 | $\alpha$ -Cubebene     | -9.0                                              | 2.54E-07 | 0.6                               | 32.3        | 2.3   | -2.3                                             |
| 25 | Cyclosativene          | -8.9                                              | 3.00E-07 | 0.6                               | 31.9        | 2.6   | -2.3                                             |
| 26 | $\alpha$ -Copaene      | -8.2                                              | 9.78E-07 | 0.6                               | 34.1        | 2.4   | -2.3                                             |
| 27 | $\beta$ -Patchoulene   | -9.4                                              | 1.29E-07 | 0.6                               | 33.7        | 2.3   | -2.4                                             |
| 28 | $\beta$ -Bourbonene    | -9.1                                              | 2.14E-07 | 0.6                               | 32.6        | 2.4   | -2.3                                             |
| 29 | $\beta$ -Elemene       | -8.0                                              | 1.37E-06 | 0.5                               | 28.7        | 1.1   | -2.1                                             |
| 30 | $\beta$ -Caryophyllene | -9.1                                              | 2.14E-07 | 0.6                               | 32.3        | 1.9   | -2.3                                             |
| 31 | Seychellene            | -8.4                                              | 6.98E-07 | 0.6                               | 30.1        | 1.7   | -2.2                                             |
| 32 | $\alpha$ -Guaiene      | -9.0                                              | 2.54E-07 | 0.6                               | 32.3        | 1.9   | -2.3                                             |
| 33 | $\alpha$ -Humulene     | -9.1                                              | 2.14E-07 | 0.6                               | 32.6        | 1.6   | -2.3                                             |

|    |                              |      |          |     |      |     |      |
|----|------------------------------|------|----------|-----|------|-----|------|
| 34 | allo-Aromadendrene           | -8.6 | 4.98E-07 | 0.6 | 30.8 | 2.0 | -2.2 |
| 35 | $\alpha$ -Patchoulene        | -8.7 | 4.21E-07 | 0.6 | 31.2 | 2.0 | -2.2 |
| 36 | $\gamma$ -Muurolene          | -9.2 | 1.81E-07 | 0.6 | 33.0 | 2.2 | -2.4 |
| 37 | Germacrene-D                 | -8.8 | 3.55E-07 | 0.6 | 31.6 | 1.6 | -2.3 |
| 38 | Valencene                    | -9.0 | 2.54E-07 | 0.6 | 32.3 | 1.9 | -2.3 |
| 39 | Eremophyllene                | -8.9 | 3.00E-07 | 0.6 | 31.9 | 1.8 | -2.3 |
| 40 | $\gamma$ -Cadinene           | -8.6 | 4.98E-07 | 0.6 | 30.8 | 1.7 | -2.2 |
| 41 | 7-epi- $\alpha$ -Selinene    | -8.8 | 3.55E-07 | 0.6 | 31.6 | 1.7 | -2.3 |
| 42 | $\delta$ -Cadinene           | -9.0 | 2.54E-07 | 0.6 | 32.3 | 1.9 | -2.3 |
| 43 | Spathulenol                  | -8.6 | 4.98E-07 | 0.5 | 28.6 | 2.9 | -2.2 |
| 44 | $\beta$ -Caryophyllene oxide | -8.3 | 8.26E-07 | 0.5 | 27.6 | 2.1 | -2.1 |
| 45 | T-Cadinol                    | -8.8 | 3.55E-07 | 0.6 | 29.0 | 2.7 | -2.2 |
| 46 | $\delta$ -Cadinol            | -8.8 | 3.55E-07 | 0.6 | 29.0 | 2.7 | -2.2 |
| 47 | Patchoulol                   | -8.6 | 4.98E-07 | 0.5 | 28.3 | 2.7 | -2.2 |

**Table S4.**  $\Delta E_{binding}$  (kcal·mol<sup>-1</sup>),  $K_d$ ,  $LE$  (kcal·mol<sup>-1</sup>),  $BEI$ (kDa),  $LLE$ ,  $IE_{norm.binding}$  (kcal·mol<sup>-1</sup>) obtained after molecular docking between *Valeriana pilosa* essential oil compounds and M<sub>2</sub> Muscarinic Acetylcholine Receptor (PDBID: 3UON).

| N° | Compounds              | $\Delta E_{binding}$<br>(kcal·mol <sup>-1</sup> ) | $K_d$    | $LE$<br>(kcal·mol <sup>-1</sup> ) | $BEI$ (kDa) | $LLE$ | $IE_{norm.binding}$<br>(kcal·mol <sup>-1</sup> ) |
|----|------------------------|---------------------------------------------------|----------|-----------------------------------|-------------|-------|--------------------------------------------------|
| 1  | Isovaleric acid        | -4.8                                              | 8.35E-04 | 0.6                               | 30.1        | 2.0   | -1.6                                             |
| 2  | Tricyclene             | -6.8                                              | 5.96E-04 | 0.4                               | 23.7        | 0.5   | -1.4                                             |
| 3  | $\alpha$ -Thujene      | -6.5                                              | 4.25E-04 | 0.5                               | 24.7        | 0.4   | -1.5                                             |
| 4  | $\alpha$ -Pinene       | -6.5                                              | 7.06E-04 | 0.4                               | 23.1        | 0.2   | -1.4                                             |
| 5  | Camphene               | -6.9                                              | 4.25E-04 | 0.5                               | 24.7        | 0.4   | -1.5                                             |
| 6  | 3-Methyl valeric acid  | -4.7                                              | 5.96E-04 | 0.6                               | 27.8        | 1.7   | -1.6                                             |
| 7  | Sabinene               | -6.5                                              | 3.59E-04 | 0.5                               | 25.3        | 0.4   | -1.5                                             |
| 8  | 1-Octen-3-ol           | -5.2                                              | 1.94E-03 | 0.4                               | 21.1        | 0.6   | -1.2                                             |
| 9  | $\beta$ -Pinene        | -6.6                                              | 5.96E-04 | 0.4                               | 23.7        | 0.2   | -1.4                                             |
| 10 | Myrcene                | -6.0                                              | 1.94E-03 | 0.4                               | 19.9        | -0.8  | -1.2                                             |
| 11 | Limonene               | -6.5                                              | 5.04E-04 | 0.5                               | 24.2        | 0.0   | -1.4                                             |
| 12 | p-Cymene               | -6.6                                              | 4.25E-04 | 0.5                               | 25.1        | 0.3   | -1.5                                             |
| 13 | 1,8-Cineole            | -6.7                                              | 5.96E-04 | 0.4                               | 20.9        | 0.5   | -1.3                                             |
| 14 | Linalool               | -6.0                                              | 5.04E-04 | 0.4                               | 21.4        | 0.6   | -1.4                                             |
| 15 | Isopentyl isovalerate  | -5.8                                              | 7.06E-04 | 0.4                               | 18.3        | 0.5   | -1.2                                             |
| 16 | Camphor                | -6.9                                              | 8.35E-04 | 0.4                               | 20.2        | 0.7   | -1.3                                             |
| 17 | Menthone               | -6.9                                              | 5.96E-04 | 0.4                               | 20.9        | 0.6   | -1.3                                             |
| 18 | Isomenthone            | -6.9                                              | 5.96E-04 | 0.4                               | 20.9        | 0.6   | -1.3                                             |
| 19 | Borneol                | -6.8                                              | 9.89E-04 | 0.4                               | 19.5        | 0.8   | -1.2                                             |
| 20 | Neomenthol             | -6.8                                              | 8.35E-04 | 0.4                               | 19.7        | 0.6   | -1.3                                             |
| 21 | Menthol                | -6.4                                              | 8.35E-04 | 0.4                               | 19.7        | 0.6   | -1.3                                             |
| 22 | Carvone                | -6.9                                              | 3.59E-04 | 0.4                               | 22.9        | 1.0   | -1.4                                             |
| 23 | Menthyl acetate        | -7.5                                              | 3.59E-04 | 0.3                               | 17.4        | 0.4   | -1.3                                             |
| 24 | $\alpha$ -Cubebene     | -8.5                                              | 9.32E-05 | 0.4                               | 19.7        | -0.2  | -1.4                                             |
| 25 | Cyclosativene          | -8.5                                              | 1.10E-04 | 0.4                               | 19.4        | 0.0   | -1.4                                             |
| 26 | $\alpha$ -Copaene      | -8.2                                              | 1.31E-04 | 0.4                               | 22.0        | 0.2   | -1.5                                             |
| 27 | $\beta$ -Patchoulene   | -9.1                                              | 5.61E-05 | 0.4                               | 20.8        | -0.3  | -1.5                                             |
| 28 | $\beta$ -Bourbonene    | -8.9                                              | 1.83E-04 | 0.3                               | 18.3        | -0.5  | -1.3                                             |
| 29 | $\beta$ -Elemene       | -8.1                                              | 2.17E-04 | 0.3                               | 17.9        | -1.1  | -1.3                                             |
| 30 | $\beta$ -Caryophyllene | -9.0                                              | 7.87E-05 | 0.4                               | 19.9        | -0.7  | -1.4                                             |
| 31 | Seychellene            | -7.9                                              | 1.10E-04 | 0.4                               | 19.4        | -0.5  | -1.4                                             |
| 32 | $\alpha$ -Guaiene      | -8.6                                              | 6.65E-05 | 0.4                               | 20.4        | -0.5  | -1.5                                             |
| 33 | $\alpha$ -Humulene     | -8.6                                              | 1.31E-04 | 0.4                               | 19.0        | -1.2  | -1.4                                             |



|    |                              |      |          |     |      |      |      |
|----|------------------------------|------|----------|-----|------|------|------|
| 34 | allo-Aromadendrene           | -8.3 | 1.10E-04 | 0.4 | 19.4 | -0.3 | -1.4 |
| 35 | $\alpha$ -Patchoulene        | -8.3 | 9.32E-05 | 0.4 | 19.7 | -0.4 | -1.4 |
| 36 | $\gamma$ -Muurolene          | -9.1 | 9.32E-05 | 0.4 | 19.7 | -0.6 | -1.4 |
| 37 | Germacrene-D                 | -8.6 | 1.55E-04 | 0.3 | 18.6 | -1.1 | -1.3 |
| 38 | Valencene                    | -8.5 | 7.87E-05 | 0.4 | 20.1 | -0.6 | -1.4 |
| 39 | Eremophyllene                | -9.1 | 9.32E-05 | 0.4 | 19.7 | -0.7 | -1.4 |
| 40 | $\gamma$ -Cadinene           | -8.6 | 9.32E-05 | 0.4 | 19.7 | -0.6 | -1.4 |
| 41 | 7-epi- $\alpha$ -Selinene    | -8.3 | 1.10E-04 | 0.4 | 19.4 | -0.8 | -1.4 |
| 42 | $\delta$ -Cadinene           | -8.8 | 1.10E-04 | 0.4 | 19.4 | -0.8 | -1.4 |
| 43 | Spathulenol                  | -8.6 | 1.10E-04 | 0.3 | 18.0 | 0.6  | -1.4 |
| 44 | $\beta$ -Caryophyllene oxide | -8.1 | 9.32E-05 | 0.3 | 18.3 | 0.1  | -1.4 |
| 45 | T-Cadinol                    | -8.5 | 1.10E-04 | 0.3 | 17.8 | 0.2  | -1.4 |
| 46 | $\delta$ -Cadinol            | -8.4 | 1.10E-04 | 0.3 | 17.8 | 0.2  | -1.4 |
| 47 | Patchoulol                   | -7.8 | 1.55E-04 | 0.3 | 17.1 | 0.2  | -1.3 |

**Table S5.**  $\Delta E_{binding}$  (kcal·mol<sup>-1</sup>),  $K_d$ ,  $LE$  (kcal·mol<sup>-1</sup>),  $BEI$ (kDa),  $LLE$ ,  $IE_{norm.binding}$  (kcal·mol<sup>-1</sup>) obtained after molecular docking between *Valeriana pilosa* essential oil compounds and L-type Volgate-gated calcium channel (PDBID: 5V2P).

| N° | Compounds              | $\Delta E_{binding}$<br>(kcal·mol <sup>-1</sup> ) | $K_d$    | $LE$<br>(kcal·mol <sup>-1</sup> ) | $BEI$ (kDa) | $LLE$ | $IE_{norm.binding}$<br>(kcal·mol <sup>-1</sup> ) |
|----|------------------------|---------------------------------------------------|----------|-----------------------------------|-------------|-------|--------------------------------------------------|
| 1  | Isovaleric acid        | -4.2                                              | 8.35E-04 | 0.6                               | 30.1        | 2.0   | -1.6                                             |
| 2  | Tricyclene             | -4.4                                              | 5.96E-04 | 0.4                               | 23.7        | 0.5   | -1.4                                             |
| 3  | $\alpha$ -Thujene      | -4.6                                              | 4.25E-04 | 0.5                               | 24.7        | 0.4   | -1.5                                             |
| 4  | $\alpha$ -Pinene       | -4.3                                              | 7.06E-04 | 0.4                               | 23.1        | 0.2   | -1.4                                             |
| 5  | Camphene               | -4.6                                              | 4.25E-04 | 0.5                               | 24.7        | 0.4   | -1.5                                             |
| 6  | 3-Methyl valeric acid  | -4.4                                              | 5.96E-04 | 0.6                               | 27.8        | 1.7   | -1.6                                             |
| 7  | Sabinene               | -4.7                                              | 3.59E-04 | 0.5                               | 25.3        | 0.4   | -1.5                                             |
| 8  | 1-Octen-3-ol           | -3.7                                              | 1.94E-03 | 0.4                               | 21.1        | 0.6   | -1.2                                             |
| 9  | $\beta$ -Pinene        | -4.4                                              | 5.96E-04 | 0.4                               | 23.7        | 0.2   | -1.4                                             |
| 10 | Myrcene                | -3.7                                              | 1.94E-03 | 0.4                               | 19.9        | -0.8  | -1.2                                             |
| 11 | Limonene               | -4.5                                              | 5.04E-04 | 0.5                               | 24.2        | 0.0   | -1.4                                             |
| 12 | p-Cymene               | -4.6                                              | 4.25E-04 | 0.5                               | 25.1        | 0.3   | -1.5                                             |
| 13 | 1,8-Cineole            | -4.4                                              | 5.96E-04 | 0.4                               | 20.9        | 0.5   | -1.3                                             |
| 14 | Linalool               | -4.5                                              | 5.04E-04 | 0.4                               | 21.4        | 0.6   | -1.4                                             |
| 15 | Isopentyl isovalerate  | -4.3                                              | 7.06E-04 | 0.4                               | 18.3        | 0.5   | -1.2                                             |
| 16 | Camphor                | -4.2                                              | 8.35E-04 | 0.4                               | 20.2        | 0.7   | -1.3                                             |
| 17 | Menthone               | -4.4                                              | 5.96E-04 | 0.4                               | 20.9        | 0.6   | -1.3                                             |
| 18 | Isomenthone            | -4.4                                              | 5.96E-04 | 0.4                               | 20.9        | 0.6   | -1.3                                             |
| 19 | Borneol                | -4.1                                              | 9.89E-04 | 0.4                               | 19.5        | 0.8   | -1.2                                             |
| 20 | Neomenthol             | -4.2                                              | 8.35E-04 | 0.4                               | 19.7        | 0.6   | -1.3                                             |
| 21 | Menthol                | -4.2                                              | 8.35E-04 | 0.4                               | 19.7        | 0.6   | -1.3                                             |
| 22 | Carvone                | -4.7                                              | 3.59E-04 | 0.4                               | 22.9        | 1.0   | -1.4                                             |
| 23 | Menthyl acetate        | -4.7                                              | 3.59E-04 | 0.3                               | 17.4        | 0.4   | -1.3                                             |
| 24 | $\alpha$ -Cubebene     | -5.5                                              | 9.32E-05 | 0.4                               | 19.7        | -0.2  | -1.4                                             |
| 25 | Cyclosativene          | -5.4                                              | 1.10E-04 | 0.4                               | 19.4        | 0.0   | -1.4                                             |
| 26 | $\alpha$ -Copaene      | -5.3                                              | 1.31E-04 | 0.4                               | 22.0        | 0.2   | -1.5                                             |
| 27 | $\beta$ -Patchoulene   | -5.8                                              | 5.61E-05 | 0.4                               | 20.8        | -0.3  | -1.5                                             |
| 28 | $\beta$ -Bourbonene    | -5.1                                              | 1.83E-04 | 0.3                               | 18.3        | -0.5  | -1.3                                             |
| 29 | $\beta$ -Elemene       | -5.0                                              | 2.17E-04 | 0.3                               | 17.9        | -1.1  | -1.3                                             |
| 30 | $\beta$ -Caryophyllene | -5.6                                              | 7.87E-05 | 0.4                               | 19.9        | -0.7  | -1.4                                             |
| 31 | Seychellene            | -5.4                                              | 1.10E-04 | 0.4                               | 19.4        | -0.5  | -1.4                                             |
| 32 | $\alpha$ -Guaiene      | -5.7                                              | 6.65E-05 | 0.4                               | 20.4        | -0.5  | -1.5                                             |
| 33 | $\alpha$ -Humulene     | -5.3                                              | 1.31E-04 | 0.4                               | 19.0        | -1.2  | -1.4                                             |

|    |                              |      |          |     |      |      |      |
|----|------------------------------|------|----------|-----|------|------|------|
| 34 | allo-Aromadendrene           | -5.4 | 1.10E-04 | 0.4 | 19.4 | -0.3 | -1.4 |
| 35 | $\alpha$ -Patchoulene        | -5.5 | 9.32E-05 | 0.4 | 19.7 | -0.4 | -1.4 |
| 36 | $\gamma$ -Muurolene          | -5.5 | 9.32E-05 | 0.4 | 19.7 | -0.6 | -1.4 |
| 37 | Germacrene-D                 | -5.2 | 1.55E-04 | 0.3 | 18.6 | -1.1 | -1.3 |
| 38 | Valencene                    | -5.6 | 7.87E-05 | 0.4 | 20.1 | -0.6 | -1.4 |
| 39 | Eremophyllene                | -5.5 | 9.32E-05 | 0.4 | 19.7 | -0.7 | -1.4 |
| 40 | $\gamma$ -Cadinene           | -5.5 | 9.32E-05 | 0.4 | 19.7 | -0.6 | -1.4 |
| 41 | 7-epi- $\alpha$ -Selinene    | -5.4 | 1.10E-04 | 0.4 | 19.4 | -0.8 | -1.4 |
| 42 | $\delta$ -Cadinene           | -5.4 | 1.10E-04 | 0.4 | 19.4 | -0.8 | -1.4 |
| 43 | Spathulenol                  | -5.4 | 1.10E-04 | 0.3 | 18.0 | 0.6  | -1.4 |
| 44 | $\beta$ -Caryophyllene oxide | -5.5 | 9.32E-05 | 0.3 | 18.3 | 0.1  | -1.4 |
| 45 | T-Cadinol                    | -5.4 | 1.10E-04 | 0.3 | 17.8 | 0.2  | -1.4 |
| 46 | $\delta$ -Cadinol            | -5.4 | 1.10E-04 | 0.3 | 17.8 | 0.2  | -1.4 |
| 47 | Patchoulol                   | -5.2 | 1.55E-04 | 0.3 | 17.1 | 0.2  | -1.3 |
